# Supplementary material
Source: PubMed Central journal article supplement (PMC9339496)
Supplement: NIHMS1811366-supplement-1.pdf [file NIHMS1811366-supplement-1.pdf]

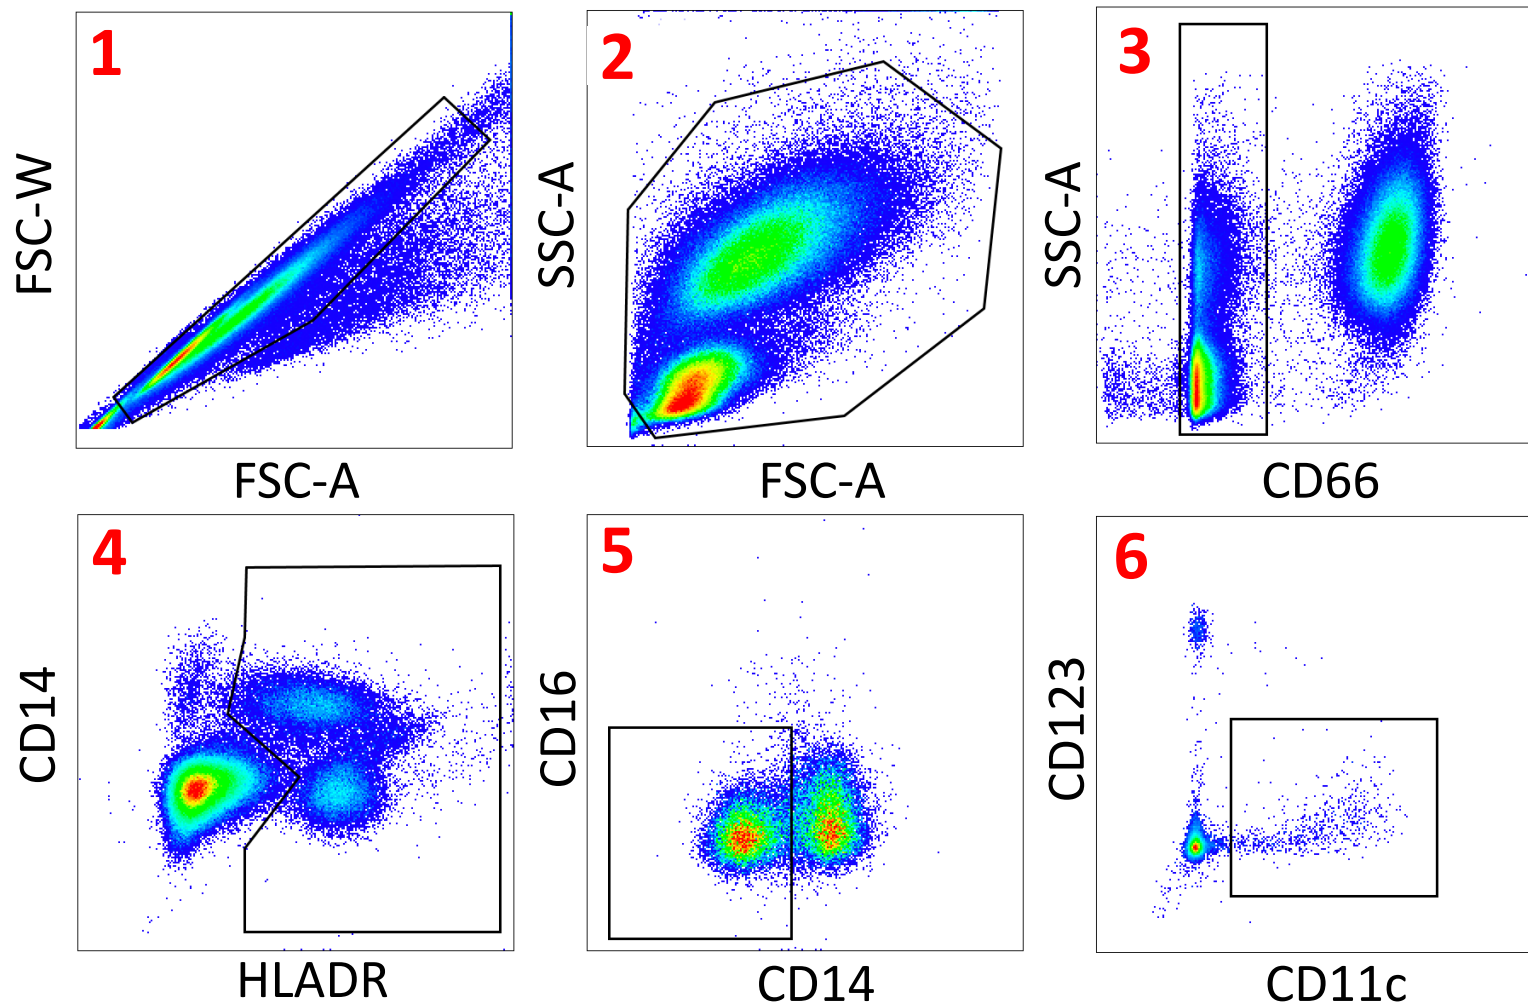

**Supplemental Figure 1. Related to Figure 2.** Gating strategy for identifying the frequency of cytokine-producing CD14<sup>+</sup> monocytes, CD11c<sup>+</sup> DC, and CD123<sup>+</sup> plasmacytoid DC in healthy study participants. 1) Singlets were selected, then 2) debris was removed. 3) CD66a/c/e<sup>+</sup> cells were excluded, then 4) HLA-DR<sup>+</sup> cells were selected. 5) CD14<sup>-</sup> and CD16<sup>-</sup> cells were selected, then CD11c<sup>+</sup> CD123<sup>-</sup> cells were identified. The proportion of cytokine-producing cells was determined from this population.

Figure S2

A

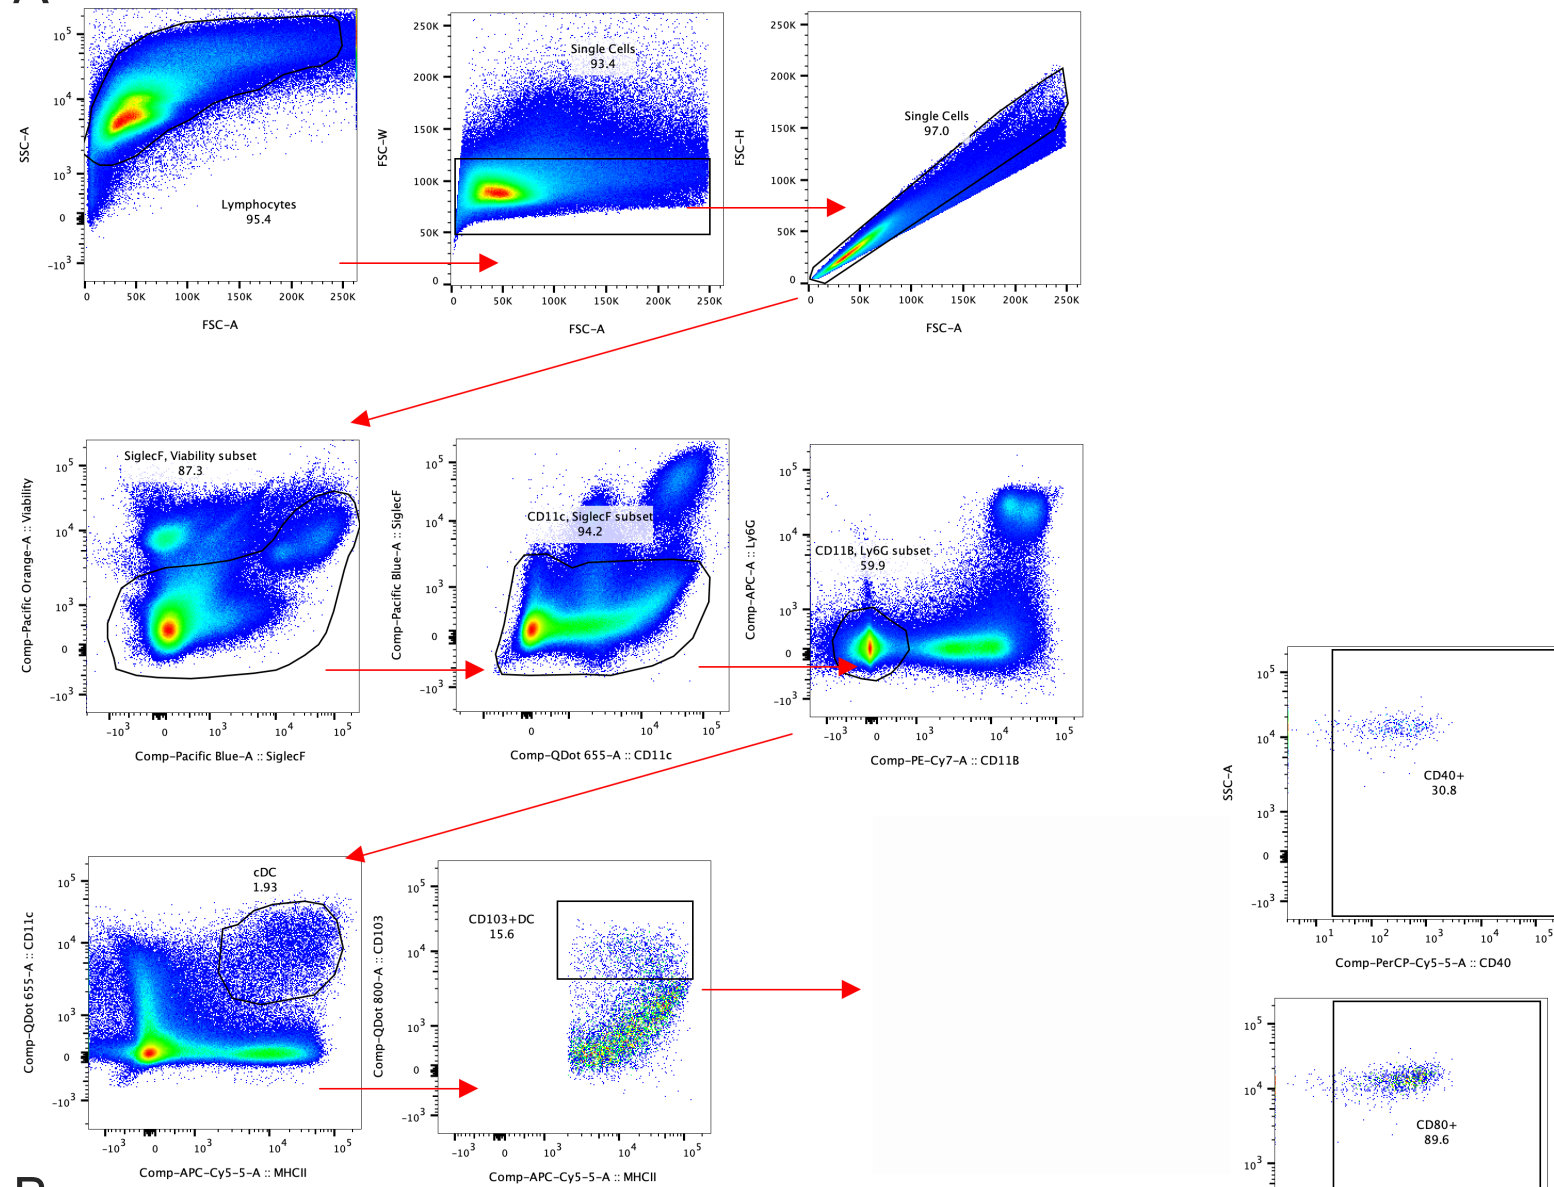

B

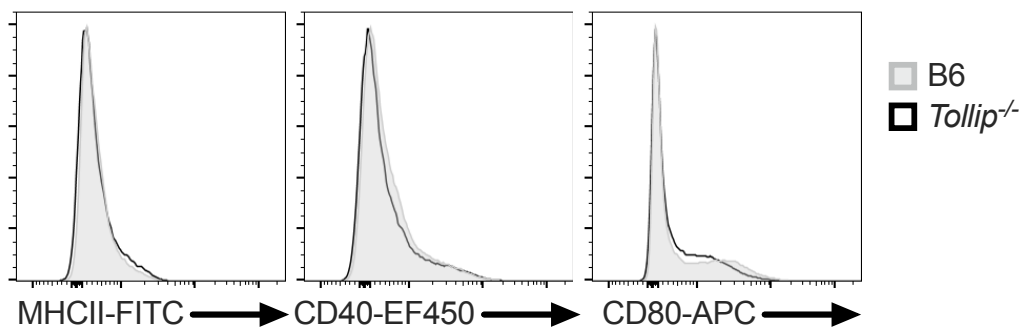

**Supplemental Figure 2. Related to Figure 4.** A) Gating strategy for measuring lung- and LN-resident DC. Lymphocytes were selected, then singlets. Live cells were selected, then SiglecF- cells were included. Ly6G<sup>+</sup> cells were excluded, then CD11c<sup>+</sup>MHCII<sup>+</sup> (I-A<sup>b</sup>) were selected. CD103<sup>+</sup> cells were identified from this population. B) Basal expression of MHC-II, CD40, and CD80 from splenic CD11c<sup>+</sup> DC in B6 and whole-body knockout *Tollip*<sup>-/-</sup> mice.

Figure S3

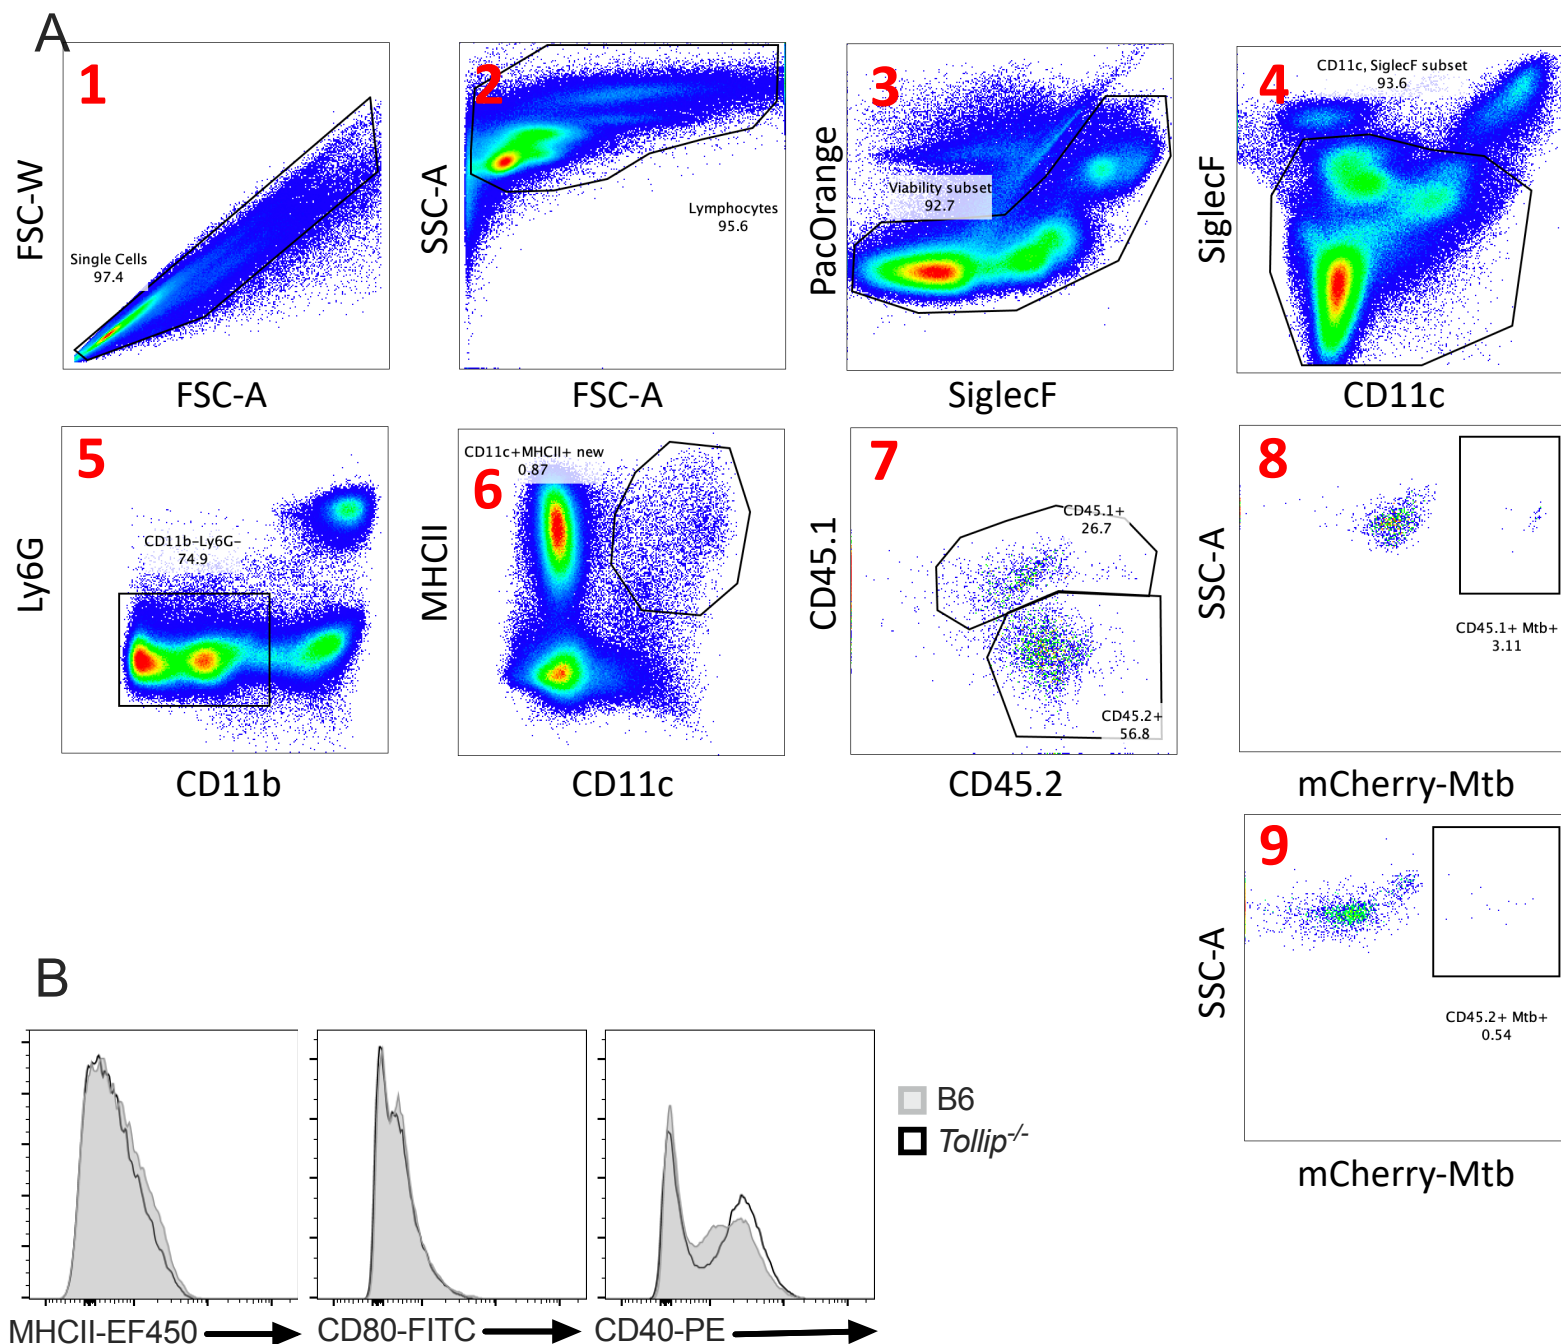

**Supplemental Figure 3. Related to Figure 5.** Gating strategy for measuring lung- and MLN-resident DC in mixed bone marrow chimeric mice. Singlets were selected, then dead cells were excluded. SiglecF<sup>+</sup> cells were excluded, along with Ly6G<sup>+</sup> and CD11b<sup>+</sup> cells. MHCII<sup>+</sup>CD11c<sup>+</sup> cells were included, then CD45.1<sup>+</sup>/CD45.2<sup>+</sup> and CD45.2<sup>+</sup> cells were identified as CD11b<sup>+</sup> or CD103<sup>+</sup> DC. B) Basal expression of MHC-II, CD40, and CD80 from splenic CD11c<sup>+</sup> DC in B6 and *Tollip*<sup>-/-</sup> lineages from mixed bone marrow chimeric mice.

Figure S4

A

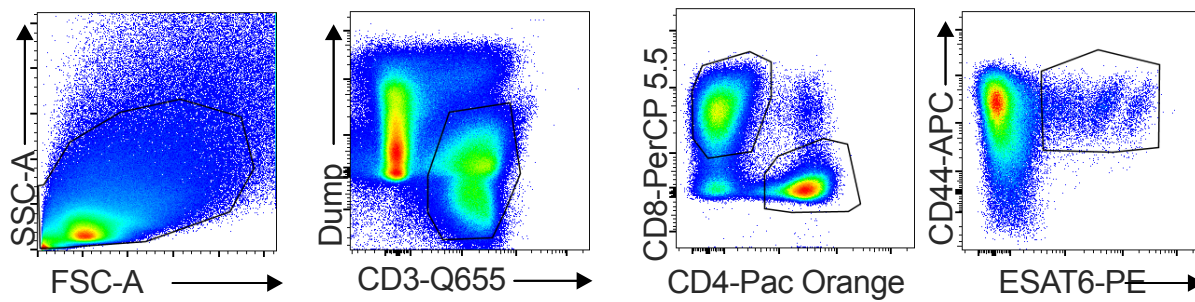

B

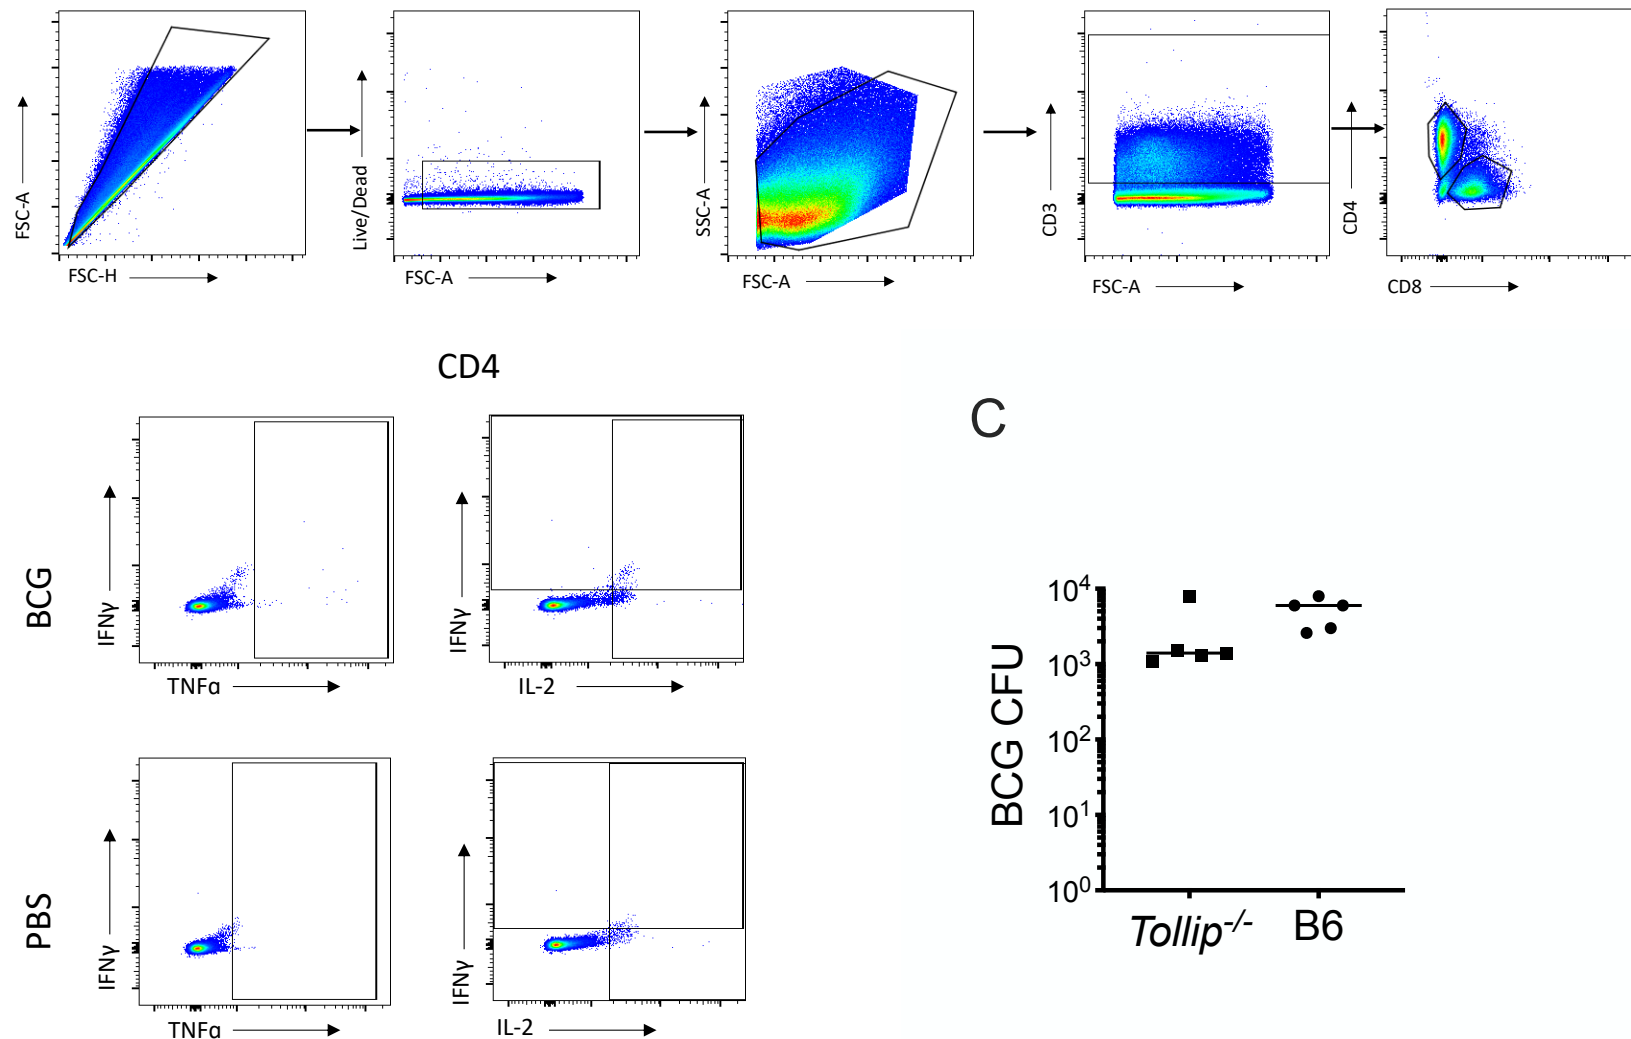

C

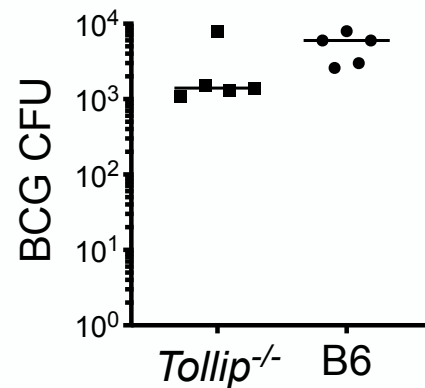

**Supplemental Figure 4. Related to Figure 6 and 7.**

A) Gating strategy for measuring the frequency of ESAT-6+CD44+CD4+ T cells in the lungs of Mtb-infected mice. Lymphocytes were selected, then CD3+ cells. CD4+ and CD8+ cells were selected, then CD44+ESAT6+ cells were selected.

B) Gating strategy for measuring the frequency of cytokine-producing cells in vaccinated mice. Singlets were selected, then dead cells were excluded. CD4+CD3+ cells were selected, then representative gates for cytokine producing cells after peptide stimulation or vehicle controls were identified.

C) BCG CFU in the spleens of B6 and Tollip<sup>-/-</sup> mice four weeks after vaccination with 10<sup>6</sup> CFU via the intravenous route.
